# Supplementary material
Source: Springer Nature journal article supplement (https://www.springermedizin.de/resource/supplementary/12889_2010_3303_MOESM1_ESM.pdf/9488670)
Supplement: MOESM1 [file 9488670]

**Increased knowledge and understanding of:**  
HIV, prevention, condoms, gender relations, violence,  
unhealthy traditions

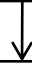

**Better attitudes to:**  
PLHIV, condoms, FSWs, equality, gender-based violence,  
female sexuality, masculinity

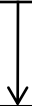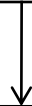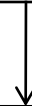

**More awareness**  
Awareness of PLHIV

**More discussion**  
Around sex, finance

**More participation**  
Testing, meetings,  
helping PLHIV

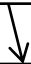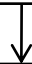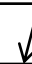

**Reduced vulnerability and risk behaviours**  
Less alcohol, less violence, less pre-marital sex, less extra-marital  
sex, less commercial sex, less anal sex, more use of condoms
